# Supplementary material for: Gathering nanorings via Fe2+–bipyridine coordination
Source: Royal Society of Chemistry journal article supplement (doi:10.1039/c5cc02694f), 2015-01-01
Supplement: c5cc02694f1.pdf [file c5cc02694f1.pdf]

**Electronic Supplementary Information**

**Gathering nanorings via Fe<sup>2+</sup>-bipyridine coordination**

*Qingqing Miao,<sup>a</sup> Chunying Yin,<sup>b</sup> Maolin Xie,<sup>c</sup> Yufeng Luo,<sup>a</sup> Zijuan Hai,<sup>a</sup> Qingpan Yuan,<sup>a</sup> Jun Jiang,<sup>c</sup> and*

*Gaolin Liang<sup>a,\*</sup>*

<sup>a</sup>CAS Key Laboratory of Soft Matter Chemistry, Departments of Chemistry, University of Science and Technology of China, 96 Jinzhai Road, Hefei, Anhui 230026, China

<sup>b</sup>Center for Integrative Imaging, Hefei National Laboratory for Physical Sciences at the Microscale, University of Science and Technology of China, Hefei, Anhui 230026, China

<sup>c</sup>Department of Chemical Physics, University of Science and Technology of China, 96 Jinzhai Road, Hefei, Anhui 230026, China.

**\* Corresponding author:**

E-mail: gliang@ustc.edu.cn (G.-L. L.).

## **Contents:**

### **1. General methods**

### **2. Chemical syntheses and characterizations of precursors and 1**

### **3. Supporting figures and tables**

### **4. References**

## **1. General methods**

All the starting materials were obtained from Adamas or Sangon Biotech. Commercially available reagents were used without further purification, unless noted otherwise. All chemicals were reagent grade or better.  $^1\text{H}$  NMR and  $^{13}\text{C}$  NMR spectra were performed on a 400 MHz Bruker AV 400. ESI mass spectra were obtained on a Finnigan LCQ Advantage ion trap mass spectrometer (ThermoFisher Corporation) equipped with a standard ESI source. HPLC analyses were performed on an Agilent 1200 HPLC system equipped with a G1322A pump and in-line diode array UV detector using a YMC-Pack ODS-AM column with  $\text{CH}_3\text{CN}$  (0.1% of TFA) and water (0.1% of TFA) as the eluent. Transmission electron micrograph (TEM) images were obtained on a JEOL 2100F electron microscope, operating at 200 kV. The cryo-dried samples were prepared as following: a copper grid coated with carbon was dipped into the suspension solvent and placed into a vial, which was plunged into liquid nitrogen until no bubbles were apparent. Then water was removed from the frozen specimen by a freeze-drier. UV-vis absorbance spectra were recorded on a lambda 25 UV-visible spectrophotometer (PerkinElmer, America) at room temperature. Fluorescence

spectra were recorded on a F-4600 fluorescence spectrophotometer (Hitachi High-Techonologies Corporation, Japan) with excitation wavelengths set to 320 nm. Dynamic light scattering (DLS) was measured on a Zeta Sizer Nano Series (Malvern Instruments).

## 2. Chemical syntheses and characterizations of precursors and 1

The preparations of compound **1** was described as below; 2-cyano-6-aminobenzothiazole (CBT) was synthesized following the literature method.<sup>1</sup>

Preparation of **1**.

*Scheme S1.* Synthetic route for compound **1**.

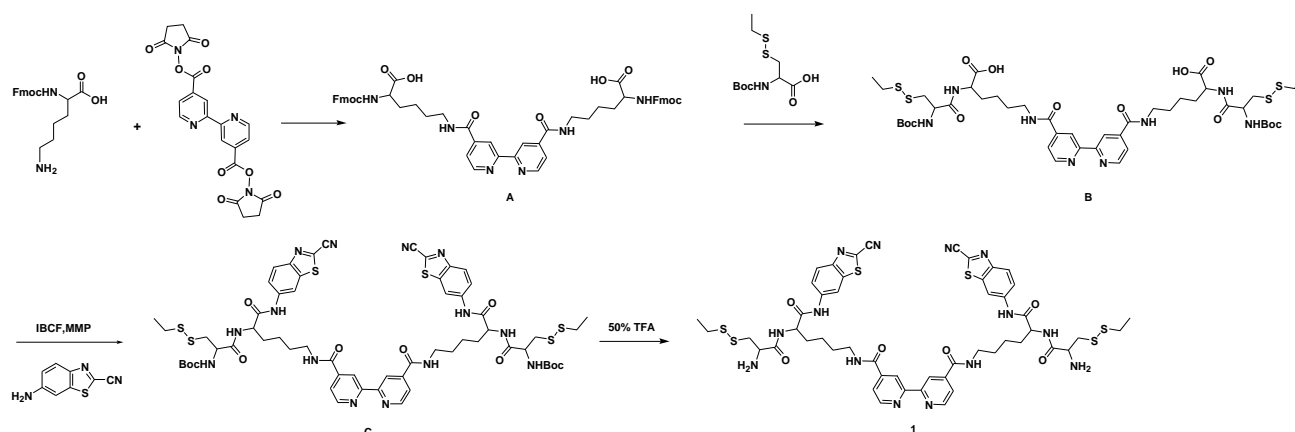

*Synthesis of A:*

Fmoc-Lys-OH-HCl (1.104 g, 2.5 mmol) was dissolved in 15 mL of dry DMF and then DIEA (400  $\mu$ L, 2.35 mmol) was added. 4,4'-dicarboxysuccinimidyl-2,2'-bipyridine (438 mg, 1 mmol) in dry DMF was added dropwise into the solution and stirred for 24 h at room temperature. The solvent was removed under reduced pressure and the reaction mixture was subjected to HPLC purification to yield pure compound **A**

(740 mg, 78%). MS of **A**: calc. for  $C_{54}H_{53}N_6O_{10}$ ,  $[(M+H)^+]$ : 945.38; obsvd. ESI-MS:  $m/z$  945.42 (Figure S1).

*Synthesis of 1:*

Compound **B** (**B**, 103 mg, 0.1 mmol) was prepared by solid phase peptide synthesis (SPPS). The isobutyl chloroformate (8.7  $\mu$ L, 0.12 mmol) was added to a mixture of **B** (180 mg, 0.1 mmol) and 4-methylmorpholine (MMP, 8.5  $\mu$ L, 0.15 mmol) in THF (1.5 mL) at 0 °C under  $N_2$  and the reaction mixture was stirred for 20 min. The solution of 2-cyano-6-aminobenzothiazole (CBT, 18 mg, 0.1 mmol) was added to the reaction mixture and further stirred for 1 h at 0 °C then overnight at room temperature. The pure product **C** (47 mg, 35%) was obtained after HPLC purification. The Boc protecting groups of **C** were cleaved with 95% TFA in  $CH_2Cl_2$  for 3 hrs in the presence of 1% triisopropylsilane. The pure product **1** (20 mg, 50%) was obtained after HPLC purification. MS of **1**: calc. for  $C_{50}H_{57}N_{14}O_6S_6$ ,  $[(M+H)^+]$ : 1141.2910; obsvd. HR-ESI-MS:  $m/z$  1141.2912 (Figure S3).  $^1H$  NMR of **1** ( $CD_3OD$ , 400 MHz, Figure S4)  $\delta$  (ppm): 8.66 (d,  $J = 4.0$  Hz, 2 H), 8.59 (d,  $J = 4.0$  Hz, 2 H), 8.53 (s, 2 H), 4.67 (m, 2 H), 4.22 (m, 2 H), 3.46 (br, 4 H), 3.07 (br, 4 H), 2.75 (br, 4H), 2.00 (br, 4H), 1.75 (br, 4H), 1.69 (br, 4H), 1.30 (m, 6 H).  $^{13}C$  NMR of compound **1** (100 MHz,  $d_6$ -DMSO, Figure S5)  $\delta$  (ppm): 170.47, 166.90, 164.42, 155.36, 149.82, 147.68, 142.87, 139.17, 136.60, 135.07, 124.76, 121.80, 120.72, 118.10, 113.48, 111.38, 53.90, 51.17, 31.80, 31.26, 28.65, 22.73, 13.97.

### 3. Supporting figures and tables

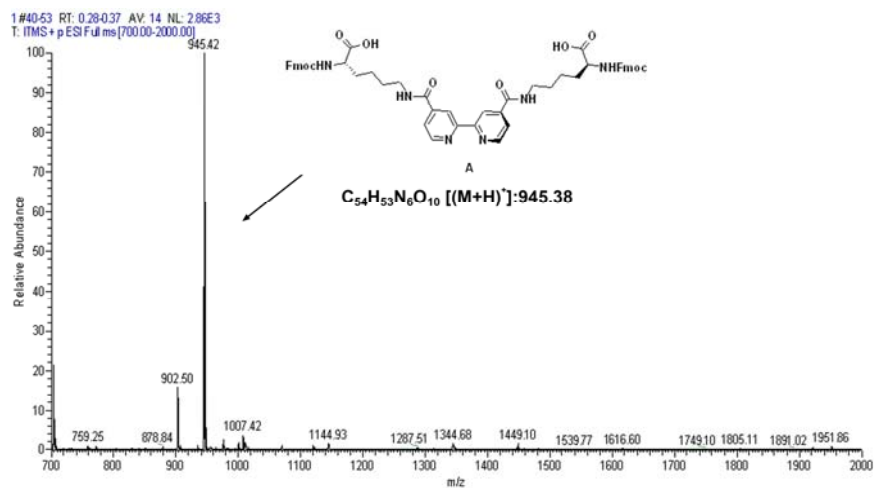

Figure S1. ESI-MS spectrum of compound A.

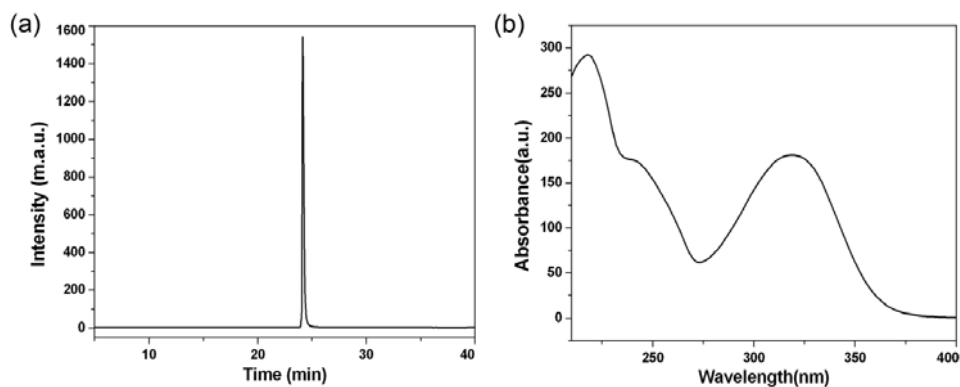

Figure S2. HPLC trace (a) and UV-vis spectrum (b) of compound 1 in distilled water, respectively.

20150504\_HE9H600-1#19-25 RT: 0.28-0.37 Av: 7 SB: 3 0.01-0.04 NL: 1.34E5  
T: FTMS + c ESI Full ms (300.00-1200.00)

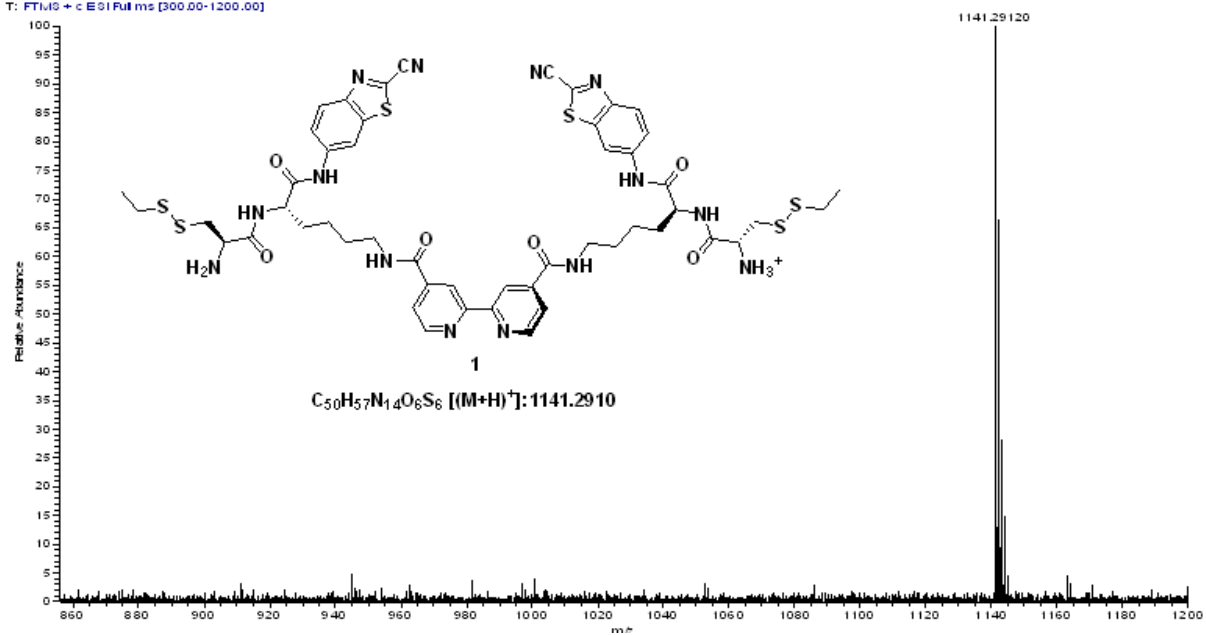

Figure S3. HR-ESI/MS spectrum of 1.

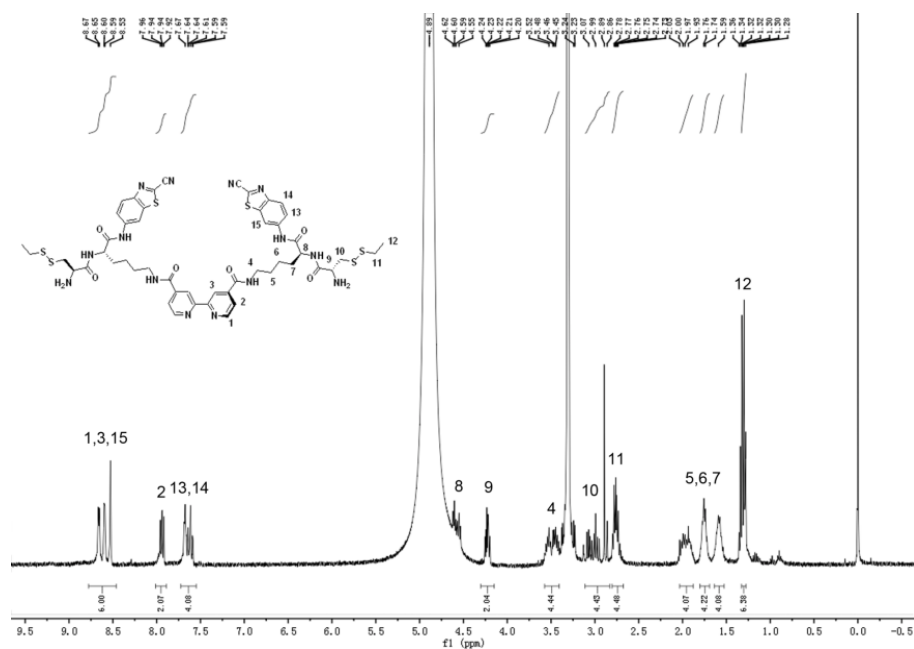

Figure S4.  $^1H$  NMR spectrum of 1.

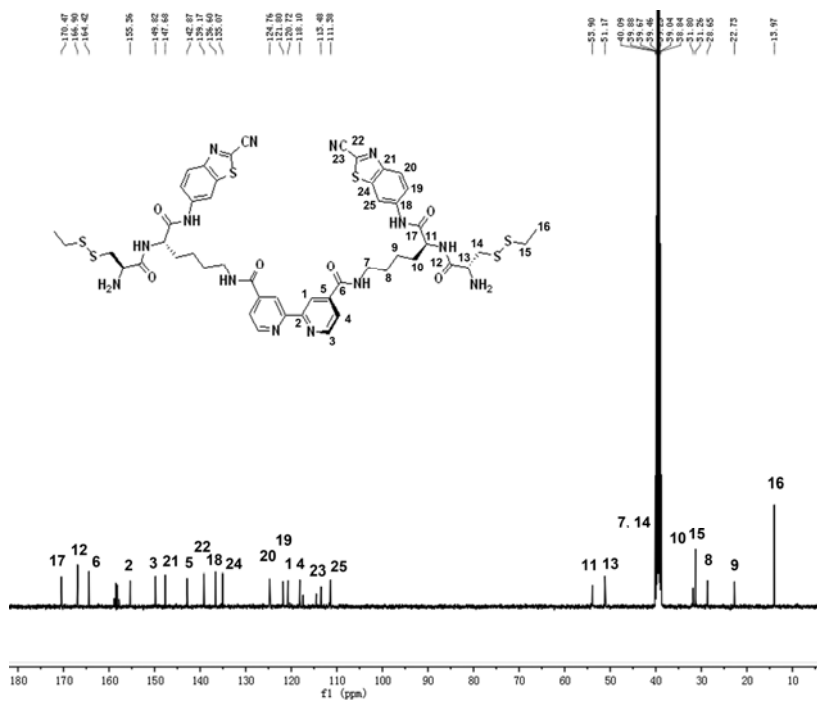

**Figure S5.**  $^{13}\text{C}$  NMR spectrum of 1.

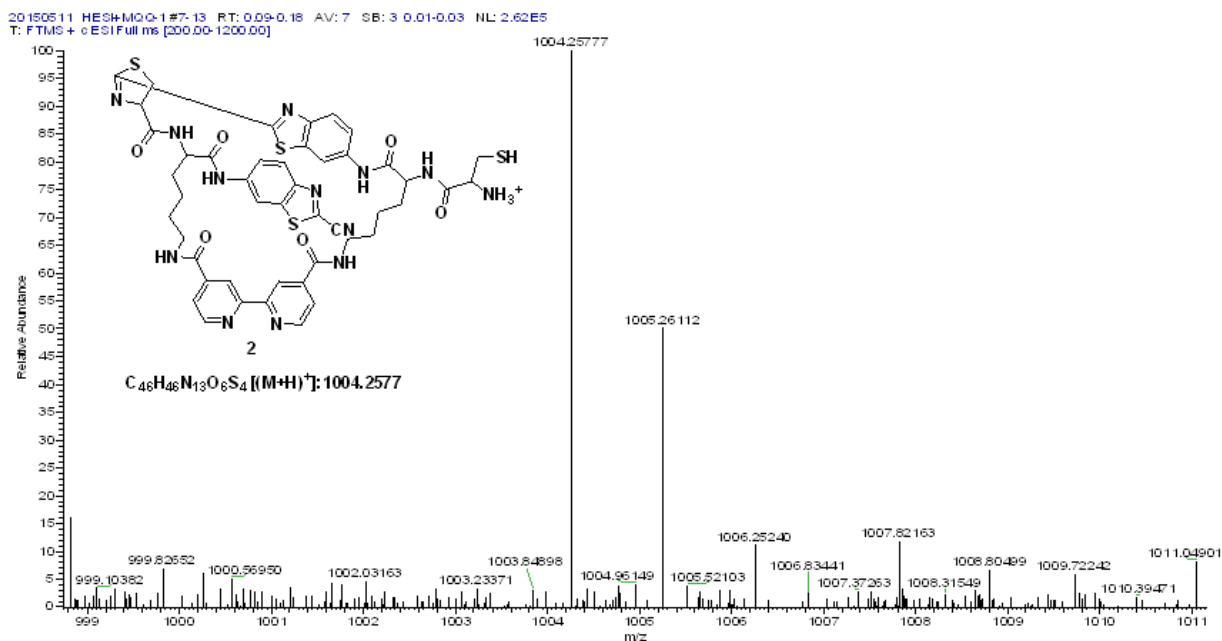

**Figure S6.** HR-ESI/MS spectrum of HPLC peak at retention time of 21.5 min in Figure 2a.

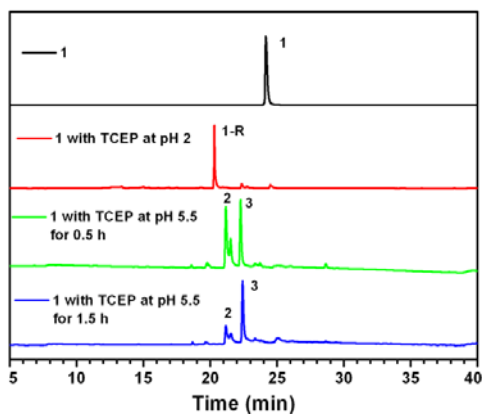

**Figure S7.** HPLC traces of **1** (black), 100  $\mu\text{M}$  of **1** with 4 equiv. of TCEP at pH 2 for 0.5 h (red), 100  $\mu\text{M}$  of **1** with 4 equiv. of TCEP at pH 5.5 for 0.5 h (green), 100  $\mu\text{M}$  of **1** with 4 equiv. of TCEP at pH 5.5 for 1.5 h (blue). Absorbance: 320 nm.

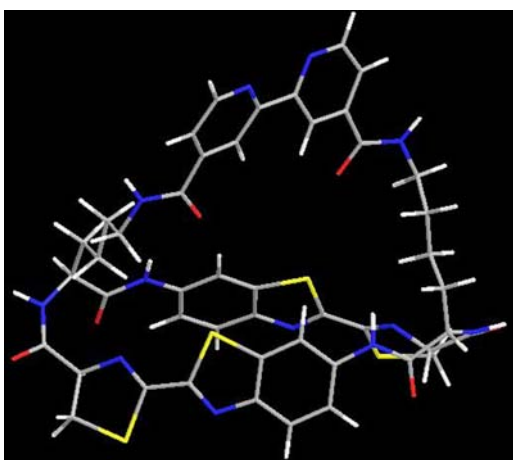

**Figure S8.** Theoretically optimized molecular structure of **3**.



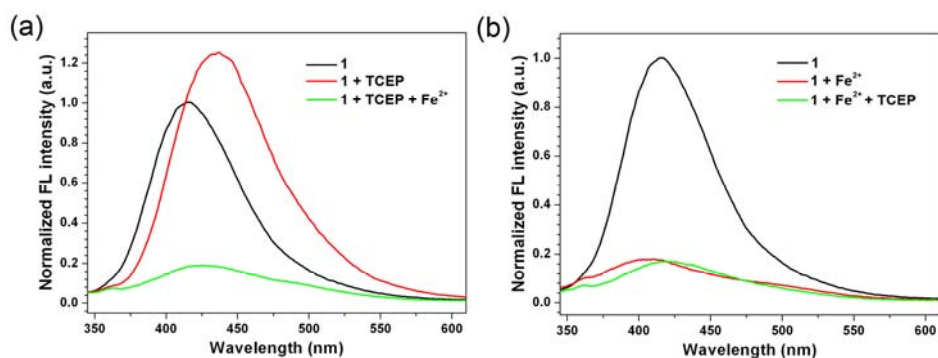

**Figure S9.** (a) Fluorescence spectra of **1** at 100  $\mu\text{M}$  (black), 100  $\mu\text{M}$  **1** reduced by 400  $\mu\text{M}$  TCEP at pH 5.5 for 1.5 h (red), 100  $\mu\text{M}$  **1** reduced by 400  $\mu\text{M}$  TCEP for 1.5 h and then treated with 1 mM  $\text{Fe}^{2+}$  at pH 5.5 for 1 h (green). Excitation: 320 nm. (b) Fluorescence spectra of **1** at 100  $\mu\text{M}$  (black), 100  $\mu\text{M}$  **1** treated with 1 mM  $\text{Fe}^{2+}$  at pH 5.5 for 1 h (red), 100  $\mu\text{M}$  **1** treated with 1 mM  $\text{Fe}^{2+}$  for 1 h and then reduced by 400  $\mu\text{M}$  TCEP at pH 5.5 for 1.5 h (green). Excitation: 320 nm.

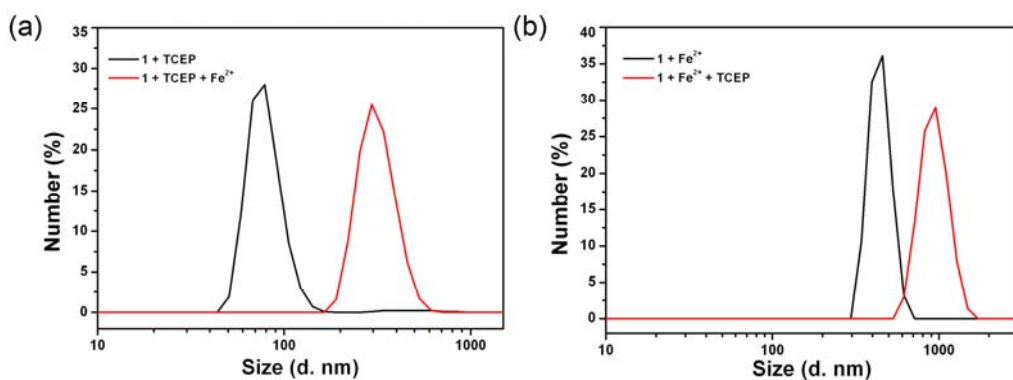

**Figure S10.** (a) Dynamic light scattering (DLS) analysis of particles-size distribution of 100  $\mu\text{M}$  **1** incubated with 400  $\mu\text{M}$  TCEP at pH 5.5 and room temperature for 1.5 h (black), 100  $\mu\text{M}$  **1** incubated with 400  $\mu\text{M}$  TCEP at pH 5.5 and room temperature for 1.5 h and then treated with 1 mM  $\text{Fe}^{2+}$  for another 1 h (red). (b) Dynamic light scattering (DLS) analysis of particles-size distribution of 100  $\mu\text{M}$  **1** incubated with

1 mM Fe<sup>2+</sup> at pH 5.5 and room temperature for 1 h (black), 100 μM **1** incubated with 1 mM Fe<sup>2+</sup> at pH 5.5 and room temperature for 1 h and then treated with 400 μM TCEP for another 1.5 h (red).

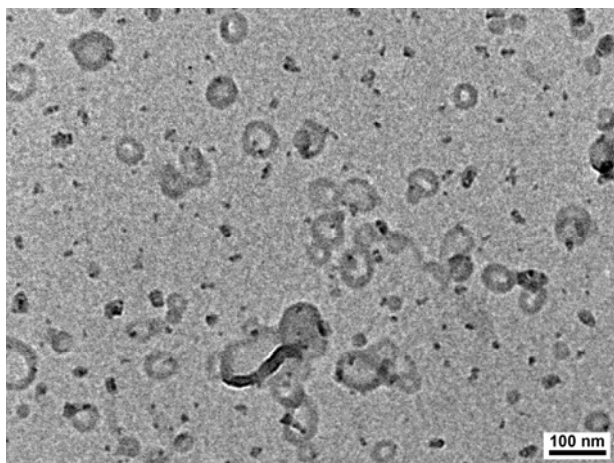

**Figure S11.** Low magnification of TEM images of nanorings in the reaction mixture of 100 μM **1** treated with 400 μM TCEP at pH 5.5 for 1.5 h.

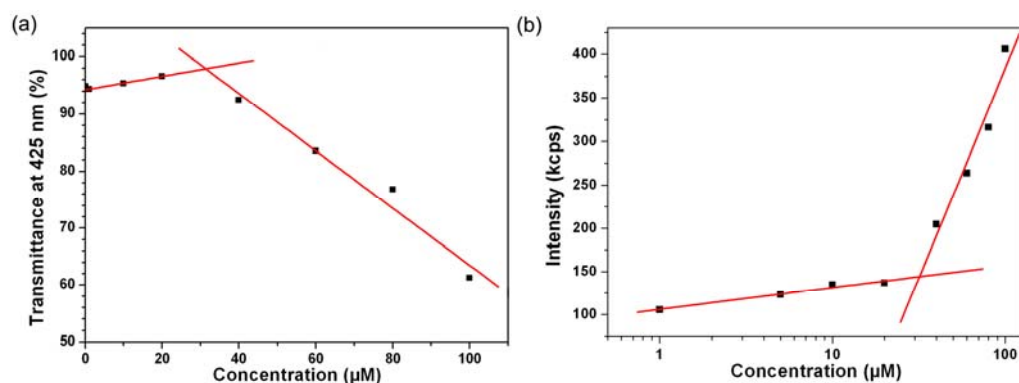

**Figure S12.** (a) Concentration-dependent optical transmittance at 425 nm of **1** treated with 4 equiv. of TCEP in water at pH 5.5. (b) Concentration-dependent DLS at 633 nm of **1** treated with 4 equiv. of TCEP in water at pH 5.5.

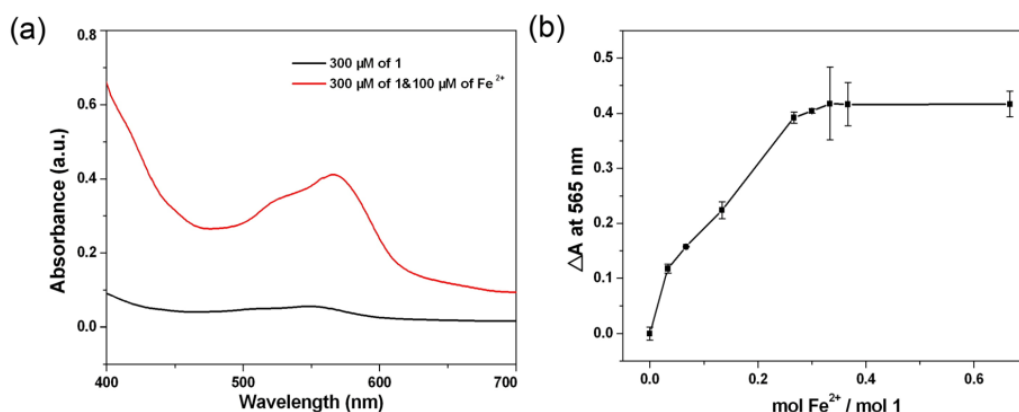

**Figure S13.** (a) UV-vis spectra of 300 μM **1** (black) and 300 μM **1** with 100 μM Fe<sup>2+</sup> (red), respectively. (b) UV-vis titration of 300 μM **1** with Fe<sup>2+</sup>. The addition of Fe<sup>2+</sup> to a solution of 300 μM **1** generated a maximum absorbance at 565 nm, suggesting the formation of the Fe<sup>2+</sup>-bipyridine coordination (Figure S13a). Besides, by plotting the absorbance at 565 nm with the molar ration of Fe<sup>2+</sup> to **1**, a relative molar ratio of 1:3 was achieved, which was consistent with the bidentate coordination of bipyridine to octahedral Fe<sup>2+</sup> (Figure S13b).

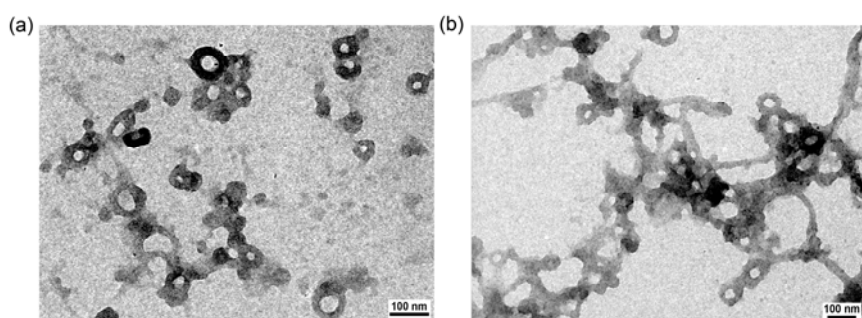

**Figure S14.** TEM images of nanorings in the reaction mixture of 100 μM **1** treated with 400 μM TCEP at pH 5.5 for 1.5 h, followed by addition of 100 μM Fe<sup>2+</sup> (a), 10 mM Fe<sup>2+</sup> (b) and then incubated for 1 h.

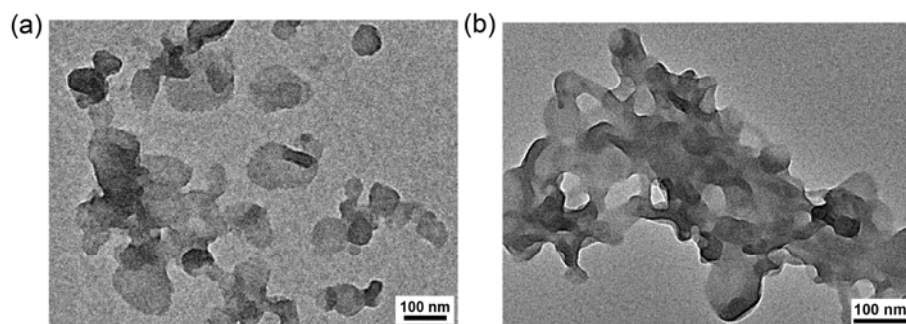

**Figure S15.** TEM images of the amorphous structures in the mixture of 100  $\mu\text{M}$  **1** treated with 1 mM  $\text{Fe}^{2+}$

(a), 100  $\mu\text{M}$  **1** treated with 1 mM  $\text{Fe}^{2+}$  and then reduced by 400  $\mu\text{M}$  TCEP (b).

**Table S1.** HPLC condition for the purification of precursors and **1**.

| Time (minute) | Flow (ml/min.) | $\text{H}_2\text{O}$ % | $\text{CH}_3\text{CN}$ % |
|---------------|----------------|------------------------|--------------------------|
| 0             | 3.0            | 30                     | 70                       |
| 3             | 3.0            | 30                     | 70                       |
| 35            | 3.0            | 0                      | 100                      |
| 37            | 3.0            | 0                      | 100                      |
| 38            | 3.0            | 30                     | 70                       |
| 40            | 3.0            | 30                     | 70                       |

#### 4. References

1 E. H. White, H. Worther, H. H. Seliger and W. D. Mcelroy, *J. Am. Chem. Soc.*, 1966, **88**, 2015-2019.
